# Supplementary material for: Dielectric interlayers for increasing the transparency of metal films for mid-infrared attenuated total reflection spectroscopy
Source: Royal Society of Chemistry journal article supplement (doi:10.1039/c0cp01125h), 2010-01-01
Supplement: c0cp01125h.pdf [file c0cp01125h.pdf]

# Electronic supplementary information: computation of reflectance spectra

Martina Reithmeier, Andreas Erbe

In this manuscript, reflectivities are calculated using the matrix methods for stratified systems [1–4]. These formulae have been implemented in a self-developed computer program [5]. For an overview, we here reproduce the essential equations needed for computation, without giving any derivations, following the treatment of Schubert [4].

Now, consider a stratified system, consisting of homogeneous layers, each with thickness  $d_j$  and complex permittivity  $\epsilon_j = m_j^2$ , where  $m_j$  is the complex refractive index of the respective layer. Light is incident on the stack through a medium of incidence with complex refractive index  $m_a$  under an angle  $\phi$ , passes the stack, and exits through an exit medium with refractive index  $m_f$ .

For each wavelength, the complex amplitudes of the partial waves with s- and p-polarisations in the exit medium,  $C_s$  and  $C_p$ , are related to the corresponding amplitudes of the incident wave,  $A_s$  and  $A_p$  as well as the amplitudes of the reflected waves in the incident medium,  $B_s$  and  $B_p$ , through a transfer matrix  $\hat{T}$ ,

$$\begin{pmatrix} A_s \\ B_s \\ A_p \\ B_p \end{pmatrix} = \hat{T} \begin{pmatrix} C_s \\ 0 \\ C_p \\ 0 \end{pmatrix}. \quad (1)$$

In each layer, a partial transfer matrix  $\hat{T}_{i,p}$  connects the in-plane electric field components from the interface at the side of incidence to the field components at the interface on the exit side. Introducing incident  $\hat{L}_a$  and exit matrix  $\hat{L}_f$ ,  $\hat{T}$  of a system with  $N$  layers is obtained as

$$\hat{T} = \hat{L}_a^{-1} \prod_{j=1}^N \hat{T}_{j,p}(-d_j) \hat{L}_f. \quad (2)$$

Here, we are considering isotropic layers only. A derivation for the general case can be found elsewhere [4]. With

$$q_j = \sqrt{m_j^2 - m_a^2 \sin^2(\phi)} \quad (3)$$

and a definition of the wave vector of the incoming wave in vacuum  $k_0 = 2\pi/\lambda_0$  with the wavelength  $\lambda_0$  of the incident light in vacuum, the partial transfer matrix  $\hat{T}_{j,p}$  is obtained as

$$\hat{T}_{j,p} = \begin{pmatrix} \cos(k_0 d_j q_j) & 0 & 0 & i \frac{q_j}{\epsilon_j} \sin(k_0 d_j q_j) \\ 0 & \cos(k_0 d_j q_j) & -\frac{i}{q_j} \sin(k_0 d_j q_j) & 0 \\ 0 & -i q_j \sin(k_0 d_j q_j) & \cos(k_0 d_j q_j) & 0 \\ i \frac{\epsilon_j}{q_j} \sin(k_0 d_j q_j) & 0 & 0 & \cos(k_0 d_j q_j) \end{pmatrix}. \quad (4)$$

The incident matrix  $\hat{L}_a^{-1}$  is given as

$$\hat{L}_a^{-1} = \frac{1}{2} \begin{pmatrix} 0 & 1 & -[m_a \cos(\phi)]^{-1} & 0 \\ 0 & 1 & [m_a \cos(\phi)]^{-1} & 0 \\ \cos(\phi)^{-1} & 0 & 0 & m_a^{-1} \\ -\cos(\phi)^{-1} & 0 & 0 & m_a^{-1} \end{pmatrix}. \quad (5)$$

The exit matrix  $\hat{L}_f$  is

$$\hat{L}_f = \begin{pmatrix} 0 & 0 & \cos(\psi) & 0 \\ 1 & 0 & 0 & 0 \\ -n_f \cos(\psi) & 0 & 0 & 0 \\ 0 & 0 & n_f & 0 \end{pmatrix}, \quad (6)$$

where

$$\cos \psi = \sqrt{1 - \left[ \frac{m_a}{m_f} \sin(\phi) \right]^2}. \quad (7)$$

After computation of the total transfer matrix using Eq. 2, the reflectivities can be computed from the matrix elements of  $\hat{T}$ . The reflectivity  $R_s$  of the system with s-polarisation is obtained as

$$R_s = \left| \frac{B_s}{A_s} \right|^2 = \left| \frac{T_{21}}{T_{11}} \right|^2, \quad (8)$$

while the reflectivity  $R_p$  for p-polarisation is

$$R_p = \left| \frac{B_p}{A_p} \right|^2 = \left| \frac{T_{43}}{T_{33}} \right|^2. \quad (9)$$

For computations of spectra, wavelength-dependent optical constants have been implemented and used [5].

It should be noted that the original formulation by Schubert contains minor errors, which have been corrected [6].

## References

- [1] D. Berreman, *J. Opt. Soc. Am.*, 1972, **62**, 502–510.
- [2] P. Yeh, *Optical waves in layered media*, Wiley, 2005.
- [3] J. Lekner, *Theory of reflection of electromagnetic and particle waves*, Martinus Nijhoff Publishers, 1987.
- [4] M. Schubert, *Phys. Rev. B*, 1996, **53**, 4265–4274.
- [5] A. Erbe, *Reflcalc*, <http://home.arcor.de/aerbe/en/prog/a/reflcalc.html>.
- [6] M. Schubert, *Correction*, <http://ellipsometry.unl.edu/publications/publications.php>.
